# Supplementary material for: Serum and cerebrospinal fluid tau protein level as biomarkers for evaluating acute spinal cord injury severity and motor function outcome
Source: PubMed Central journal article supplement — Neural Regen Res. 2019 May;14(5):896–902. doi: 10.4103/1673-5374.249238 (PMC6375043; doi:10.4103/1673-5374.249238), 2019-05
Supplement: NRR-14-896_Suppl1.pdf [file NRR-14-896_Suppl1.pdf]

## OPEN PEER REVIEW REPORT 1

**Reviewer:** Pio Conti, University of Chieti, Italy.

**Comments to the authors:**

Serum and cerebrospinal fluid tau protein level as biomarkers for evaluating the severity of acute spinal cord injury in rats

I read this article with interest and I believe that it is a good piece of work, so for this reason I suggest to accept after minor revision.

- It would be interesting if the authors provided a blot or electrophoresis
- In this context immune cells are not mentioned. Please add some references.
- To clarify and improve the article, I would suggest the following articles should be studied and added to the list of references.

Feng HL, Dang HZ, Fan H, Chen XP, Rao YX, Ren Y, Yang JD, Shi J, Wang PW, Tian JZ. Curcumin ameliorates insulin signalling pathway in brain of Alzheimer's disease transgenic mice. *Int J Immunopathol Pharmacol*. 2016;29(4):734-741.

Li Q, Zhao X, Gong DH, Geng YM, Zhang HL, Bi PX. Sleep disorders of acute thalamic stroke and its influence on plasma IL-17. *J Biol Regul Homeost Agents*. 2017;31(3):745-751.

Barbagallo M, Vitaliti G, Greco F, Pavone P, Matin N, Panta G, Lubrano R, Falsaperla R. Idiopathic intracranial hypertension in a paediatric population: a retrospective observational study on epidemiology, symptoms and treatment. *J Biol Regul Homeost Agents*. 2017;31(1):195-200.

Zhang S, Wang Y, Xie H, Yu Q, Wu J, Wu Y, Zhu Y. Necroptosis and microglia activation after chronic ischemic brain injury in mice. *Eur J Inflamm*. 2017; 2:78-84.
